# Supplementary material
Source: PubMed Central journal article supplement (PMC3781636)
Supplement: supp_ddt256_ddt256supp.pdf [file supp_ddt256_ddt256supp.pdf]

**Supplemental Table. mtDNA variants in 3 Han Chinese probands with coronary heart disease**

| Gene     | Position | Replacement         | Conservation (H/B/M/X) <sup>a</sup> | CRS | BJH15 -III-7 | BJH-15 III-12 | BJH-45 III-2 | Previous reported |
|----------|----------|---------------------|-------------------------------------|-----|--------------|---------------|--------------|-------------------|
| D-loop   | 73       | A to G              |                                     | A   | G            | G             | G            | Yes               |
|          | 103      | G to A              |                                     | G   | A            | A             | A            | Yes               |
|          | 152      | T to C              |                                     | T   |              | C             | C            | Yes               |
|          | 189      | A to G              |                                     | A   |              |               | G            | Yes               |
|          | 195      | T to C              |                                     | T   |              | C             |              | Yes               |
|          | 199      | T to C              |                                     | T   |              |               | C            | Yes               |
|          | 203      | G to A              |                                     | G   |              |               | A            | Yes               |
|          | 204      | T to C              |                                     | T   |              | C             | C            | Yes               |
|          | 263      | A to G              |                                     | A   | G            | G             | G            | Yes               |
|          | 310      | T to CT/ CTC        |                                     | T   | CTC          | CT            | CT           | Yes               |
|          | 481      | C to T              |                                     | C   | T            |               |              | Yes               |
|          | 514      | C to Del            |                                     | C   | Del C        | Del C         | Del C        | Yes               |
|          | 515      | A to Del            |                                     | A   | Del A        | Del A         | Del A        | Yes               |
|          | 16140    | T to C              |                                     | T   | C            | C             | C            | Yes               |
|          | 16153    | G to A              |                                     | G   |              | A             |              | Yes               |
|          | 16183    | A to C              |                                     | A   | C            | C             | C            | Yes               |
|          | 16189    | T to C              |                                     | T   | C            | C             | C            | Yes               |
|          | 16193    | C to CC             |                                     | C   | CC           |               |              | Yes               |
|          | 16234    | C to T              |                                     | C   | T            |               |              | Yes               |
|          | 16243    | T to C              |                                     | T   | C            | C             | C            | Yes               |
|          | 16256    | C to T              |                                     | C   |              |               | T            | Yes               |
|          | 16344    | C to T              |                                     | C   | T            |               |              | Yes               |
|          | 16463    | A to G              |                                     | A   | G            |               |              | Yes               |
| 16519    | T to C   |                     | T                                   | C   | C            | C             | Yes          |                   |
| 12S rRNA | 709      | G to A              | G/G/A/A                             | G   | A            | A             | A            | Yes               |
|          | 750      | A to G              | A/A/A/ G                            | A   | G            |               | G            | Yes               |
|          | 769      | G to A              | A/A/G/A                             | G   |              | A             |              | Yes               |
|          | 961      | InsC                | C/A/T/A                             | C   |              | CC            |              | Yes               |
|          | 1438     | A to G              | A/A/A/G                             | A   | G            | G             | G            | Yes               |
|          | 1598     | G to A              | G/A/T/T                             | G   | A            | A             | A            | Yes               |
| 16S rRNA | 2626     | T to C              | T/T/A/G                             | T   |              |               | C            | Yes               |
|          | 2706     | A to G              | A/G/A/A                             | A   | G            | G             |              | Yes               |
| ND1      | 3397     | A to G (Met to Val) | M/M/M/I                             | A   |              | G             |              | Yes               |
|          | 4161     | C to T              |                                     | C   | T            |               |              | Yes               |
| ND2      | 4769     | A to G              |                                     | A   | G            | G             |              | Yes               |
|          | 4895     | A to G              |                                     | A   | G            |               |              | Yes               |
| CO1      | 6260     | G to A              |                                     | G   |              | A             |              | Yes               |
|          | 6969     | G to A (Ile to Val) | I/I/L/V                             | G   |              |               | A            | Yes               |
|          | 7028     | C to T              |                                     | C   | T            | T             | T            | Yes               |
| NC7      | 8271-79  | 9-bp del            |                                     | C   | 9 bp Del     | 9 bp Del      | 9 bp Del     | Yes               |
| ATP6     | 8584     | G to A (Ala to Thr) | A/V/V/I                             | G   | A            | A             | A            | Yes               |
|          | 8784     | A to G              |                                     | A   |              | G             |              | No                |
|          | 8829     | C to T              |                                     | C   | T            | T             | T            | Yes               |
|          | 8856     | G to A              |                                     | G   |              |               | A            | Yes               |
|          | 8860     | A to G (Thr to Ala) | T/A/A/T                             | A   | G            | G             | G            | Yes               |
| CO3      | 9950     | T to C              |                                     | T   | C            | C             | G            | Yes               |
|          | 10398    | A to G (Thr to Ala) | T/T/T/A                             | A   | G            | G             | G            | Yes               |

|      |                     |                     |         |         |   |   |   |     |     |
|------|---------------------|---------------------|---------|---------|---|---|---|-----|-----|
| ND3  | 11101               | A to G              |         | A       | G |   |   | Yes |     |
|      | 11719               | G to A              |         | G       | A | A | A | Yes |     |
| ND5  | 12361               | A to G              |         | A       | G | G | G | Yes |     |
|      | 14221               | T to C              |         | T       | C |   |   | Yes |     |
| ND6  | 14766               | C to T (Thr to Ile) | T/S/T/S | C       | T | T | T | Yes |     |
| CYTB | 15223               | C to T              |         | C       | T | T | T | Yes |     |
|      | 15323               | C to T              |         | C       |   | T | T | Yes |     |
|      | 15326               | A to G (Thr to Ala) | T/M/I/I | A       | G | G | G | Yes |     |
|      | 15508               | C to T              |         | C       | T | T | T | Yes |     |
|      | 15650               | G to A (Ala to Thr) | A/A/A/G | G       |   | A |   | Yes |     |
|      | 15662               | A to G (Ile to Val) | I/L/F/L | A       | G | G | G | Yes |     |
|      | 15850               | T to C              |         | T       | G |   |   | Yes |     |
|      | 15851               | A to G (Ile to Val) | I/A/S/M | A       | G | G | G | Yes |     |
|      | tRNA <sup>Thr</sup> | 15927               | G to A  | G/G/G/G | G | A | A | A   | Yes |

\*Conservation of amino acid for polypeptides or nucleotide for RNAs in human (H), bovine (B), mouse (M), and *Xenopus laevis* (X);

†CRS: Cambridge reference sequence;<sup>5</sup>

‡See the online mitochondrial genome database <http://www.mitomap.org> and <http://www.genpat.uu.se/mtDB/>

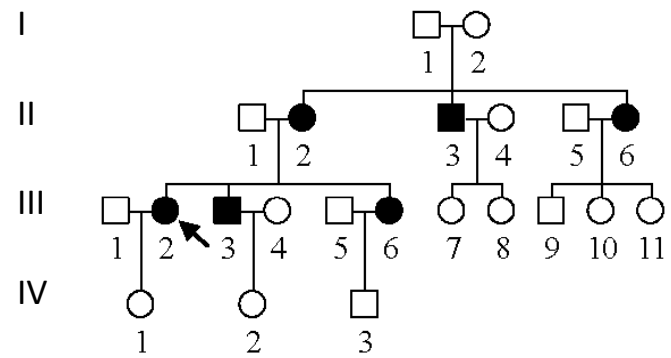

BJH45 with 15927G>A mutation
